# Supplementary material
Source: PubMed Central journal article supplement (PMC5922760)
Supplement: NIHMS959437-supplement-Supplement.pdf [file NIHMS959437-supplement-Supplement.pdf]

**Supplementary Table 1:**

| Pt | Age<br>(d) | Wt<br>(kg) | Ht<br>(cm) | BSA<br>(m <sup>2</sup> ) | Qb<br>(mL/min) | Initial Qd<br>(mL/hr) | Initial Qd<br>(mL/hr/1.73m <sup>2</sup> ) | Subsequent<br>Qd (mL/hr) | Subsequent Qd<br>(mL/hr/1.73m <sup>2</sup> ) |
|----|------------|------------|------------|--------------------------|----------------|-----------------------|-------------------------------------------|--------------------------|----------------------------------------------|
| 1  | 4          | 3.9        | 54         | 0.24                     | 30             | 5000                  | 36,042                                    | 500                      | 3604                                         |
| 2  | 4          | 3.1        | 48         | 0.20                     | 20-30          | 5000                  | 43,250                                    | 500                      | 4325                                         |

**Patient demographics and CRRT parameters.**

Wt: weight; Ht: height; BSA: body surface area; Qb: blood flow rate; Qd: dialysate flow rate.

BSA was calculated via the Mosteller formula:  $BSA (m^2) = \sqrt{(\text{height in cm} \times \text{weight in kg}/3600)}$ .
